# Supplementary material for: Targeting inflammatory sites through collagen affinity enhances the therapeutic efficacy of anti-inflammatory antibodies
Source: PubMed Central journal article supplement — Sci Adv. 2019 Nov 6;5(11):eaay1971. doi: 10.1126/sciadv.aay1971 (PMC6834392; doi:10.1126/sciadv.aay1971), 2019-11-06
Supplement: aay1971_SM.pdf [file aay1971_SM.pdf]

## Supplementary Materials for

### **Targeting inflammatory sites through collagen affinity enhances the therapeutic efficacy of anti-inflammatory antibodies**

Kiyomitsu Katsumata, Jun Ishihara, Aslan Mansurov, Ako Ishihara, Michal M. Racz, Eiji Yuba, Jeffrey A. Hubbell\*

\*Corresponding author. Email: [jhubbell@uchicago.edu](mailto:jhubbell@uchicago.edu)

Published 6 November 2019, *Sci. Adv.* **5**, eaay1971 (2019)

DOI: 10.1126/sciadv.aay1971

#### **The PDF file includes:**

- Fig. S1. The molecular weight of  $\alpha$ -TNF was increased by CBP conjugation.
- Fig. S2. The target and sequence specificity of CBP.
- Fig. S3. Distribution of CBP- $\alpha$ -TNF to organs and tissues in the arthritis model.
- Fig. S4. CBP- $\alpha$ -TNF reduces macrophages and neutrophils within the paws.
- Fig. S5. Effect of subcutaneous injection of CBP- $\alpha$ -TNF in the arthritis model.
- Fig. S6. Short-term safety study of CBP- $\alpha$ -TNF in the arthritis model.
- Fig. S7. CBP conjugation provided collagen affinity to  $\alpha$ -TGF- $\beta$ .

#### **Other Supplementary Material for this manuscript includes the following:**

(available at [advances.sciencemag.org/cgi/content/full/5/11/eaay1971/DC1](https://advances.sciencemag.org/cgi/content/full/5/11/eaay1971/DC1))

Data file S1 (Microsoft Excel format). Original data.

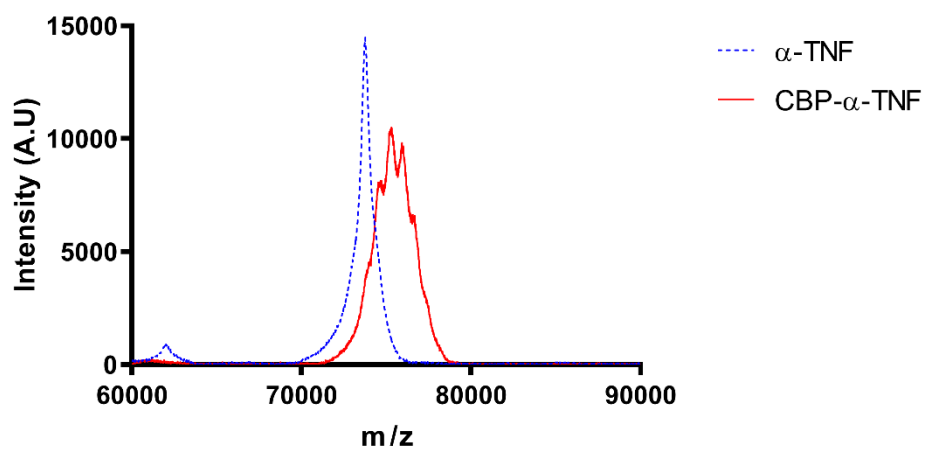

**Fig. S1. The molecular weight of  $\alpha$ -TNF was increased by CBP conjugation.** Unmodified  $\alpha$ -TNF and CBP- $\alpha$ -TNF was analyzed by MALDI-TOF MS. Abscissa is mass to charge ratio (m/z) and ordinate is intensity of doubly charged ions.

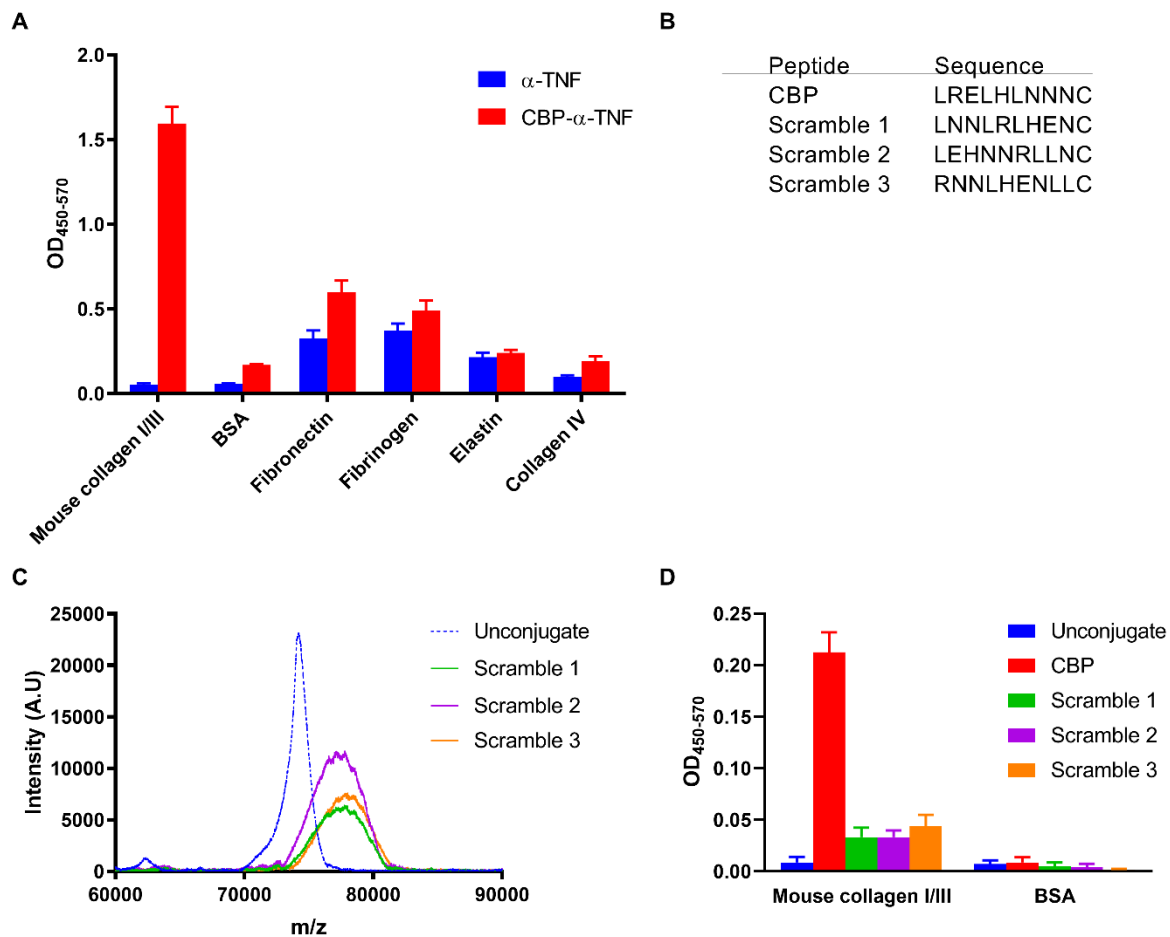

**Fig. S2. The target and sequence specificity of CBP.** (A) Unmodified  $\alpha$ -TNF and CBP- $\alpha$ -TNF binding affinities to mouse types I and III collagen, BSA, fibronectin, fibrinogen, and elastin are analyzed by ELISA (n=3, mean + SD). (B) Sequences of CBP and its sequence scrambled peptides (Scramble 1, Scramble 2, and Scramble 3), (C) Unmodified  $\alpha$ -TNF (unconjugate) and scramble peptide-conjugated  $\alpha$ -TNF analyzed by MALDI-TOF MS. Abscissa is mass to charge ratio (m/z) and ordinate is intensity of doubly charged ions. (D) Unmodified  $\alpha$ -TNF, CBP- $\alpha$ -TNF, and scramble peptide-conjugated  $\alpha$ -TNF binding affinities to mouse types I and III collagen and BSA are analyzed by ELISA (n=3, mean + SD).

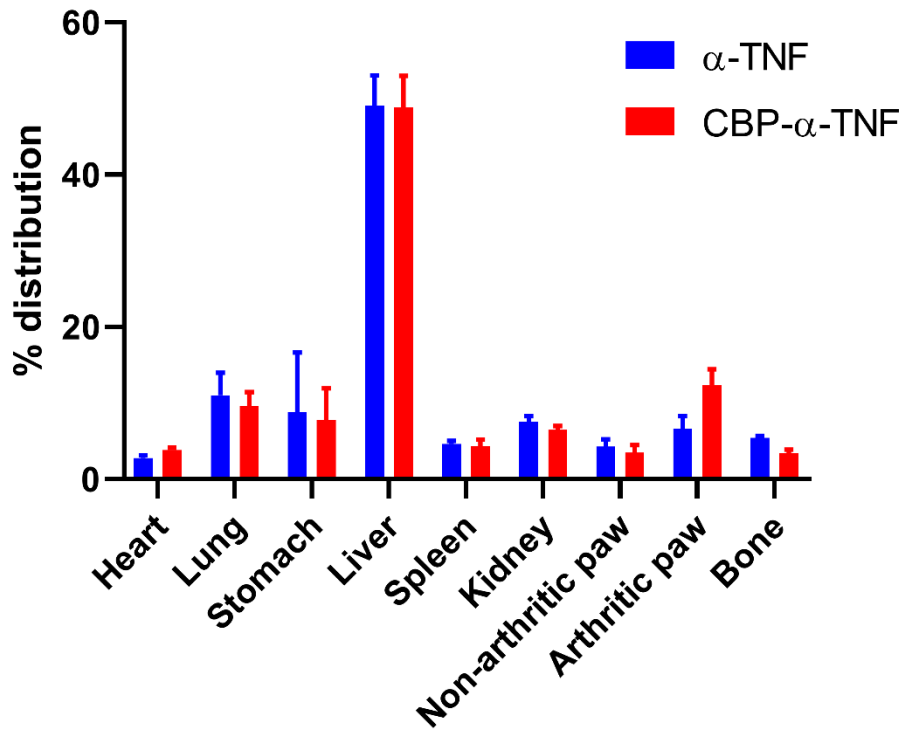

**Fig. S3. Distribution of CBP- $\alpha$ -TNF to organs and tissues in the arthritis model.** Arthritis (CAIA) was induced selectively in the right hind paw by passive immunization of anti-collagen antibodies, followed by subcutaneous injection of LPS at right hind footpad and of PBS at left hind footpad. On the day following LPS injection, Cy7 labeled CBP- $\alpha$ -TNF and Cy7 labeled  $\alpha$ -TNF were intravenously injected into naïve and CAIA mice. One hour after the injection, heart, lung, stomach, liver, spleen, kidney, left hind paw (non-arthritic paw), right hind paw (arthritic paw), and left hind femur/knee/tibia (bone) were collected and their fluorescence levels were measured. Data represent the distribution of Cy7 labeled  $\alpha$ -TNF and Cy7 labeled CBP- $\alpha$ -TNF as determined by fluorescence analysis of each organ (n=4, mean + SD).

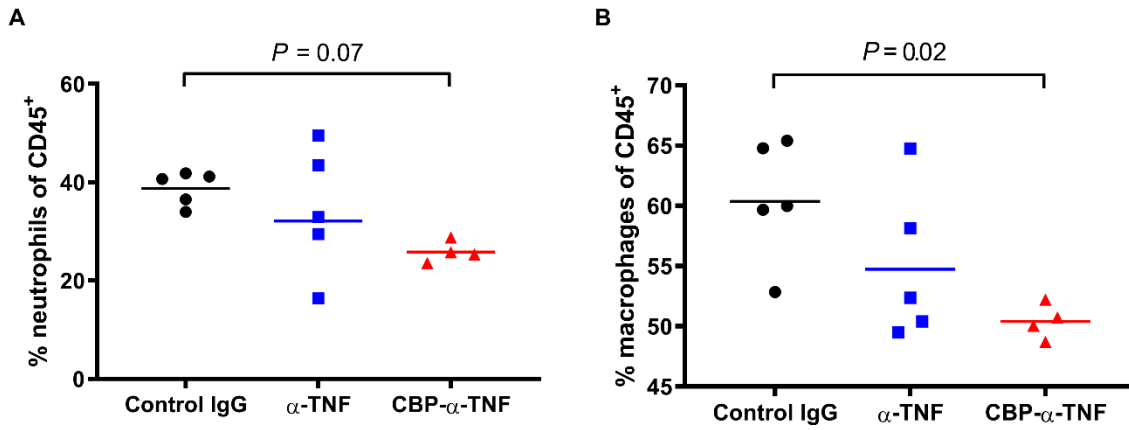

**Fig. S4. CBP- $\alpha$ -TNF reduces macrophages and neutrophils within the paws.** The number of leukocytes within the paws were analyzed by flow cytometry (n=4-5). Graphs depict (A) Ly6ChighLy6G<sup>+</sup>CD11b<sup>+</sup> neutrophils within CD45<sup>+</sup> cells, (B) F4/80<sup>+</sup>CD11b<sup>+</sup> macrophages within CD45<sup>+</sup> cells. Bars represent geometric mean. Statistical analyses were performed using Tukey's multiple comparison test.

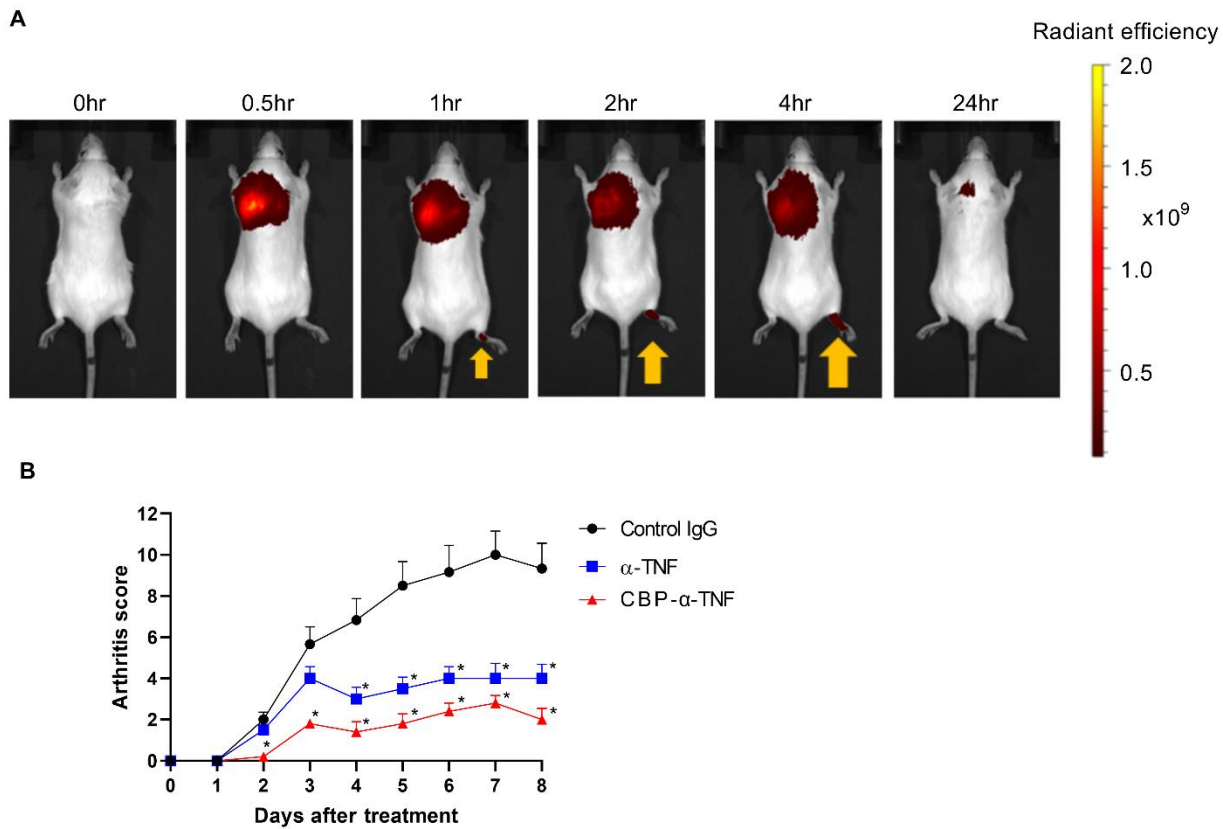

**Fig. S5. Effect of subcutaneous injection of CBP- $\alpha$ -TNF in the arthritis model.** (A) Arthritis was induced selectively in right hind paw by passive immunization of anti-collagen antibodies, followed by subcutaneous injection of LPS at right hind footpad and PBS at left hind footpad. On the day following LPS injection, Cy7 labeled CBP- $\alpha$ -TNF was subcutaneously injected at the back of the mouse. Representative images of accumulation in arthritic or non-arthritic paws of mice injected with CBP- $\alpha$ -TNF (indicated by arrows). (B) Arthritis was induced in all paws by passive immunization of anti-collagen antibodies, followed by intraperitoneal injection of LPS. On the day of LPS injection, control IgG, unmodified  $\alpha$ -TNF, or CBP- $\alpha$ -TNF was subcutaneously injected. Arthritis scores represent the mean + SE from 5 or 6 mice. \*  $P < 0.05$ , compared with control (Dunnett's multiple comparison test).

**A**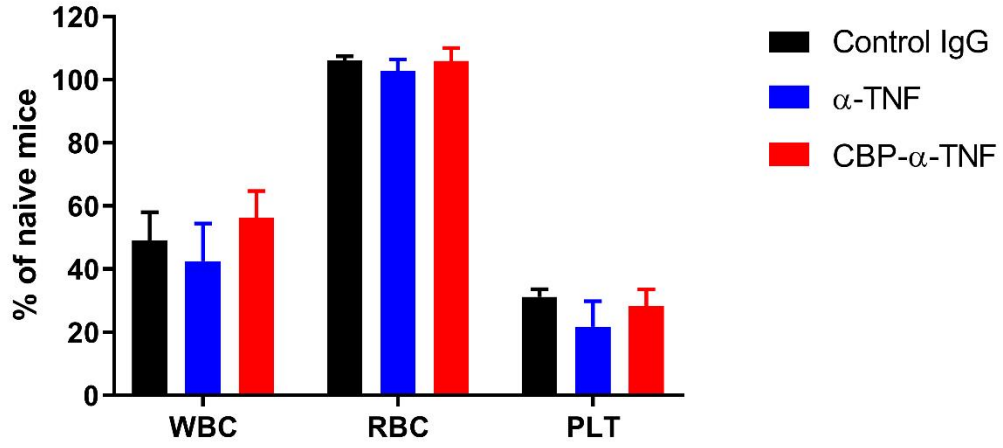**B**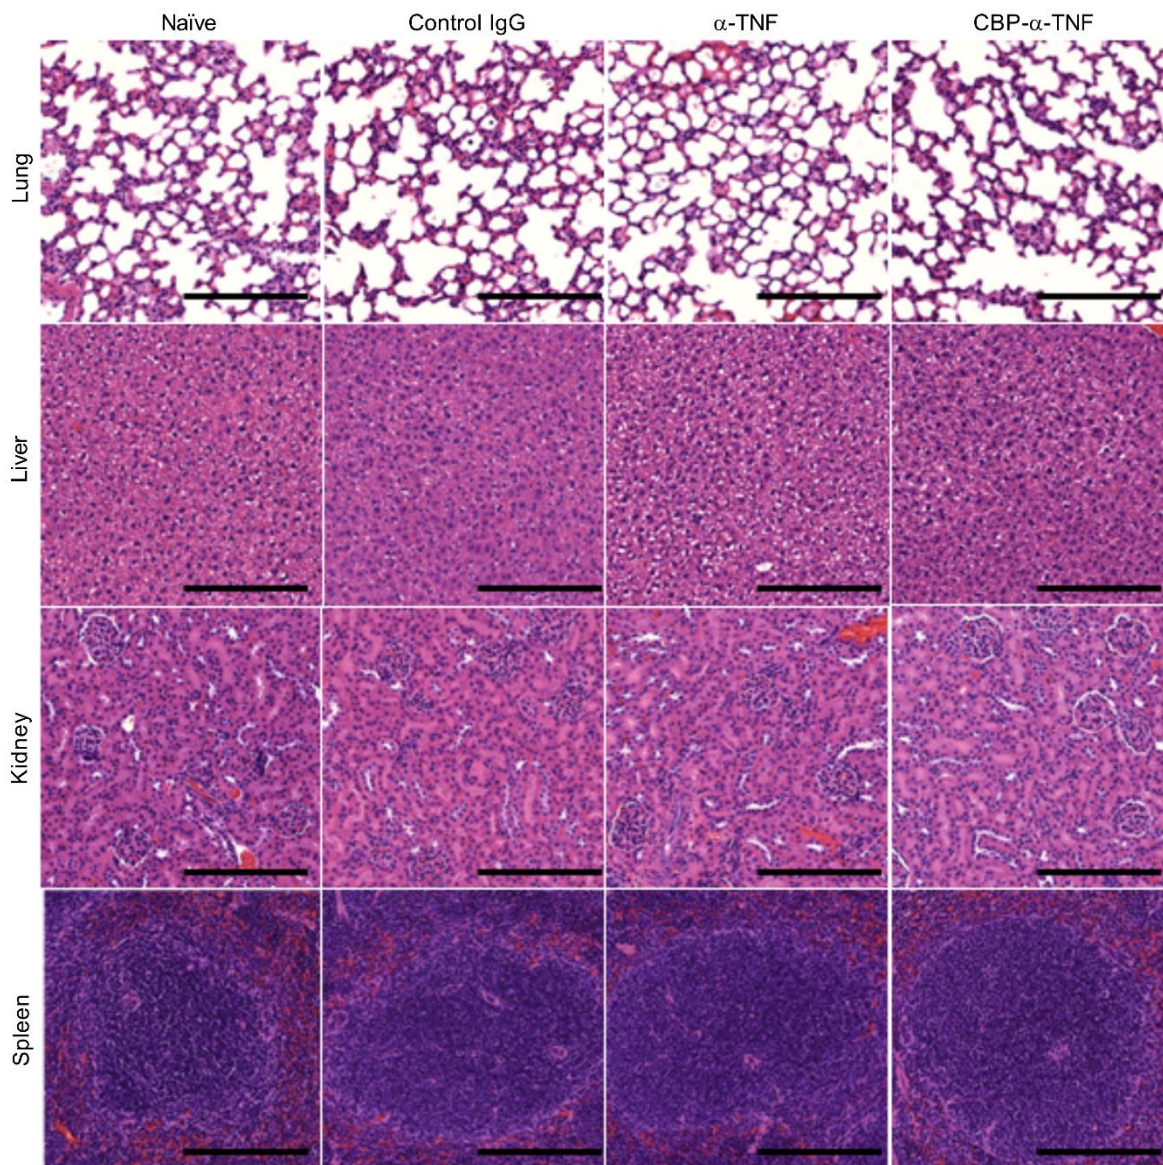



**Fig. S6. Short-term safety study of CBP- $\alpha$ -TNF in the arthritis model.** Mice were given anti-collagen antibody, followed by LPS. On the day of LPS injection, control IgG, unmodified  $\alpha$ -TNF, or CBP- $\alpha$ -TNF at 200  $\mu$ g/mouse was intravenously injected. **(A)** Complete cell counts (white blood cells [WBC], red blood cells [RBC], and platelets [PLT]) on the following day of drug injection (n=3, mean + SD). **(B)** H&E staining of major organs collected three days after drug injection. Scale bar, 200  $\mu$ m.

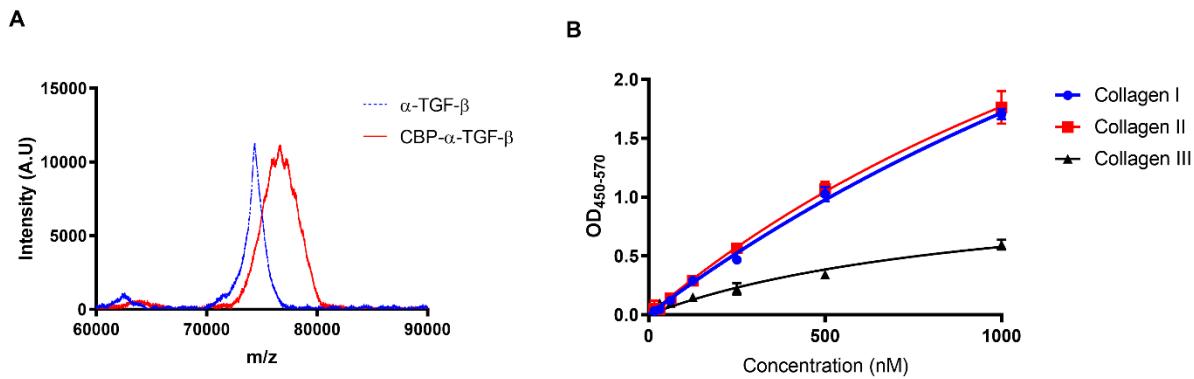

**Fig. S7. CBP conjugation provided collagen affinity to  $\alpha$ -TGF- $\beta$ .** **(A)** Unmodified  $\alpha$ -TGF- $\beta$  and CBP- $\alpha$ -TGF- $\beta$  analyzed by MALDI-TOF MS. Abscissa is mass to charge ratio (m/z) and ordinate is intensity of doubly charged ions. **(B)** CBP- $\alpha$ -TGF- $\beta$  binding affinities to types I, II, and III collagen are analyzed by ELISA (n=3, mean  $\pm$  SD).
